# Supplementary material
Source: Springer Nature journal article supplement (https://www.springermedizin.de/resource/supplementary/12936_2013_3092_MOESM11_ESM.pdf/9545444)

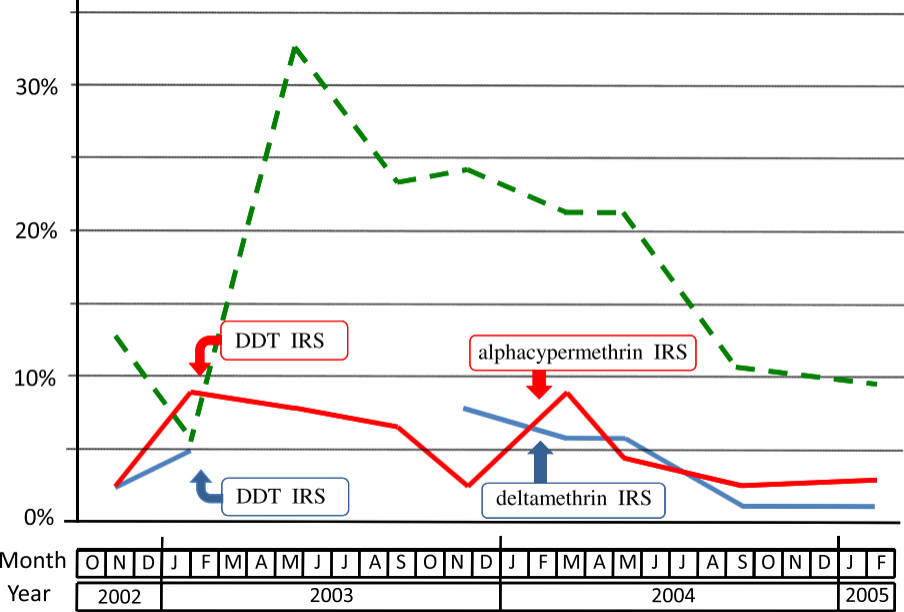

Supplement: MOESM11 [file 9545444]
